# Supplementary material for: Bioactive Cembranoids, Sarcocrassocolides P–R, from the Dongsha Atoll Soft Coral Sarcophyton crassocaule
Source: Mar Drugs. 2014 Jan 28;12(2):840–50. doi: 10.3390/md12020840 (PMC3944518; doi:10.3390/md12020840)

## Supplementary Information

**Figure S1.**  $^1\text{H}$  NMR spectrum of **1** in  $\text{CDCl}_3$  at 500 MHz.

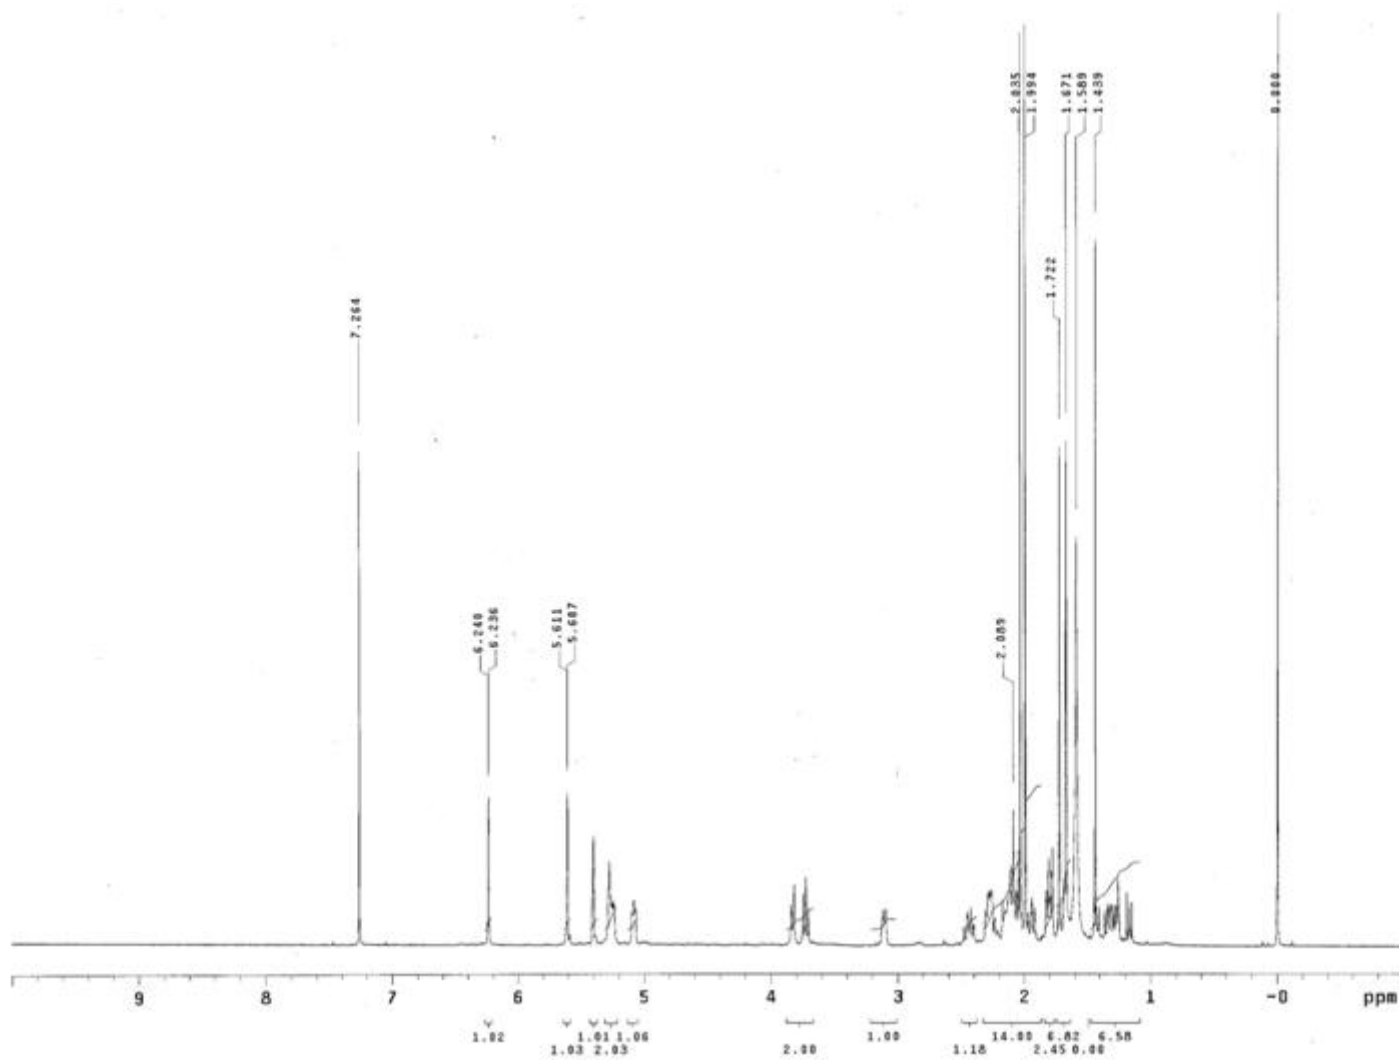

**Figure S2.**  $^1\text{H}$  NMR spectrum (1.3–6.3 ppm) of **1** in  $\text{CDCl}_3$  at 500 MHz.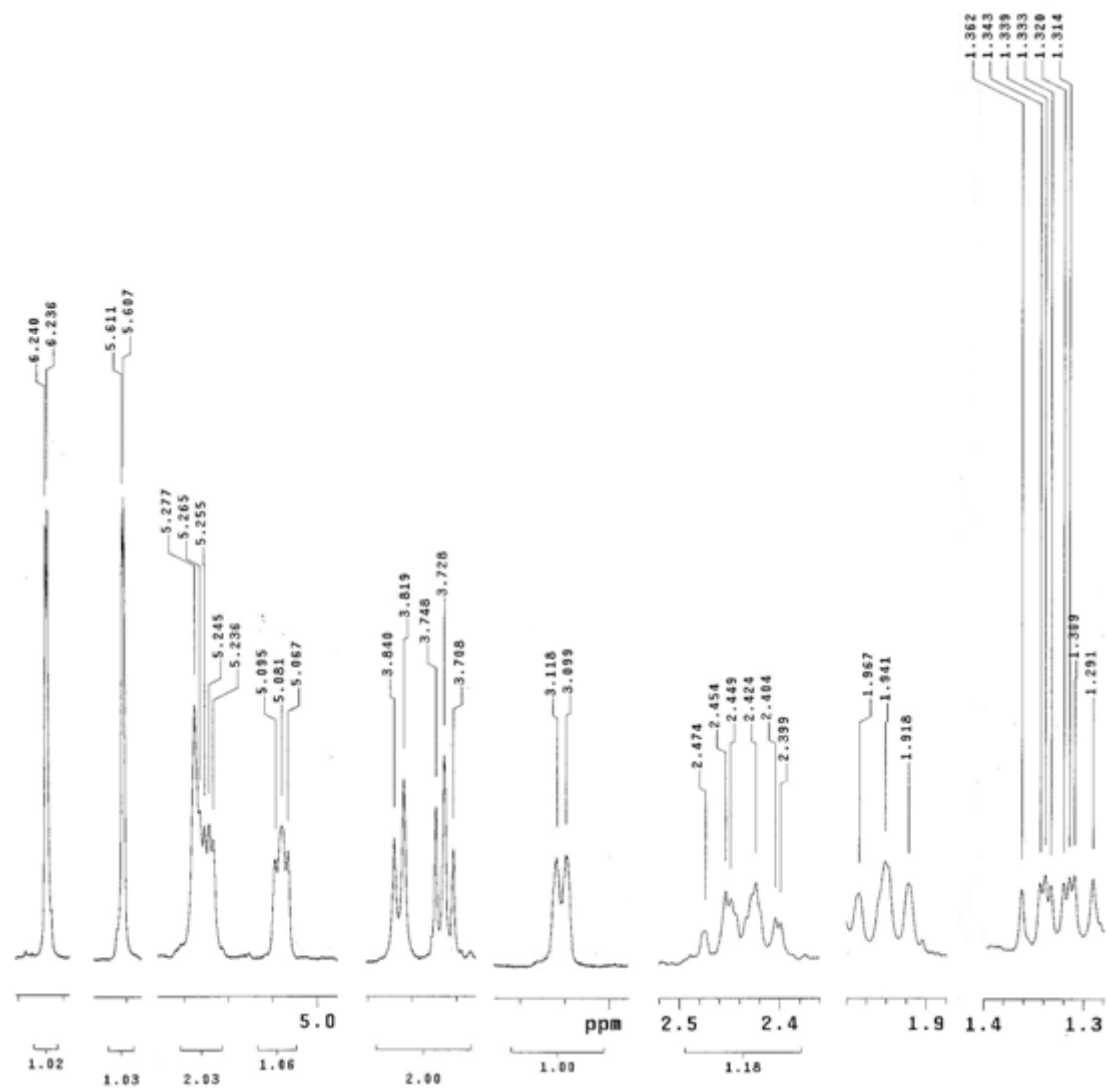

**Figure S3.**  $^{13}\text{C}$  NMR spectrum of **1** in  $\text{CDCl}_3$  at 125 MHz.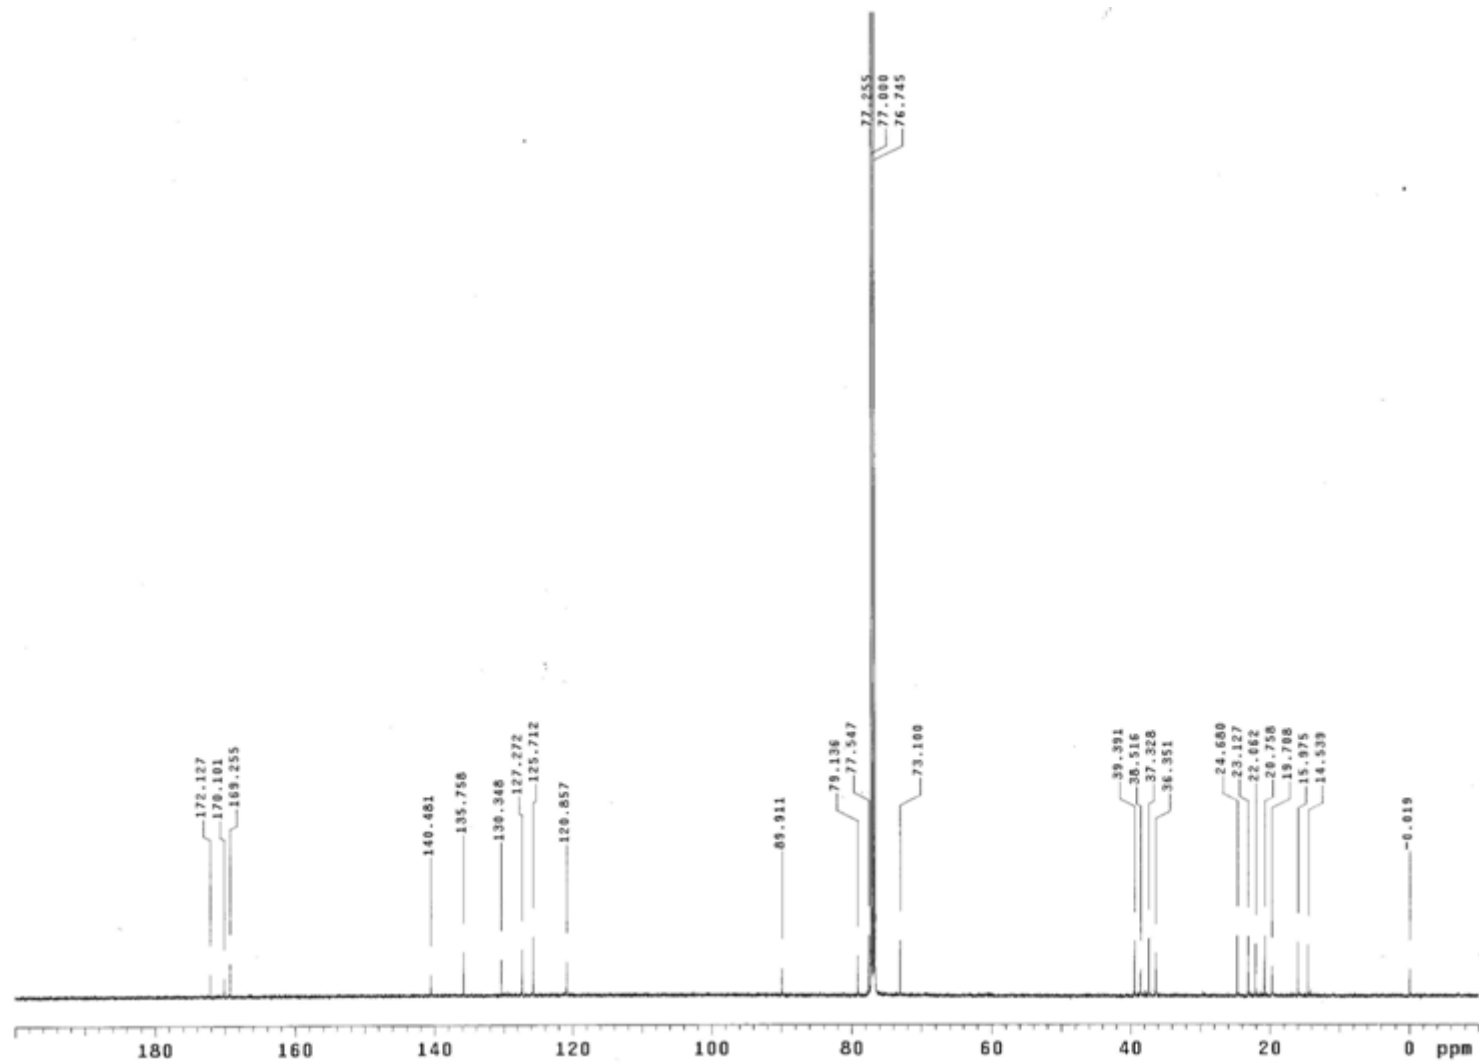

**Figure S4.**  $^1\text{H}$  NMR spectrum of **2** in  $\text{CDCl}_3$  at 500 MHz.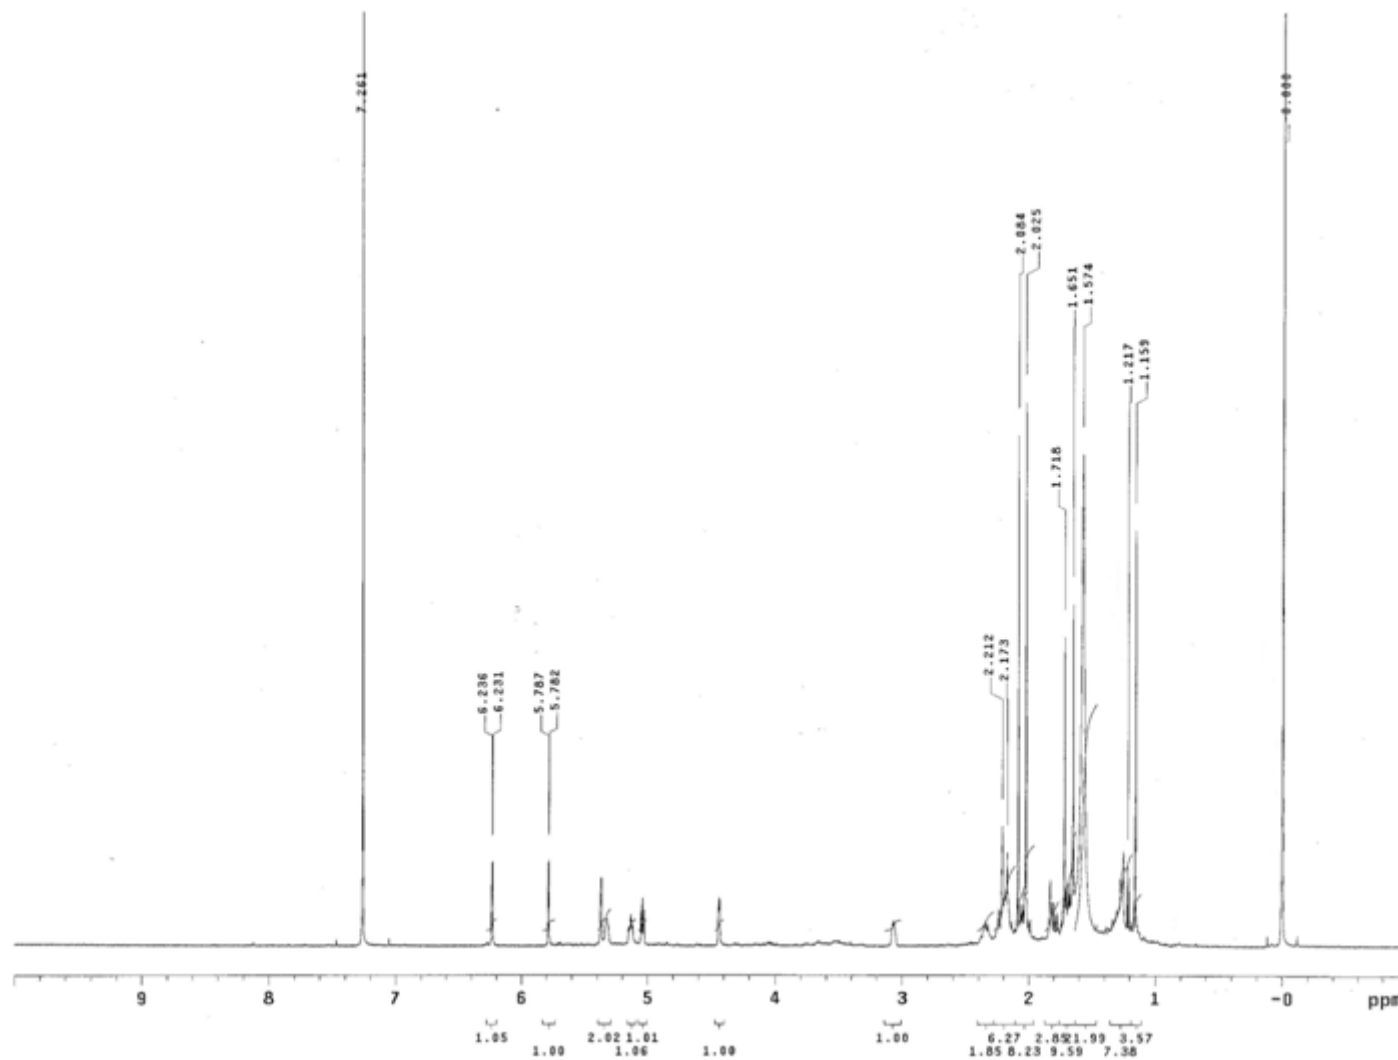

**Figure S5.**  $^1\text{H}$  NMR spectrum (1.8–6.3 ppm) of **2** in  $\text{CDCl}_3$  at 500 MHz.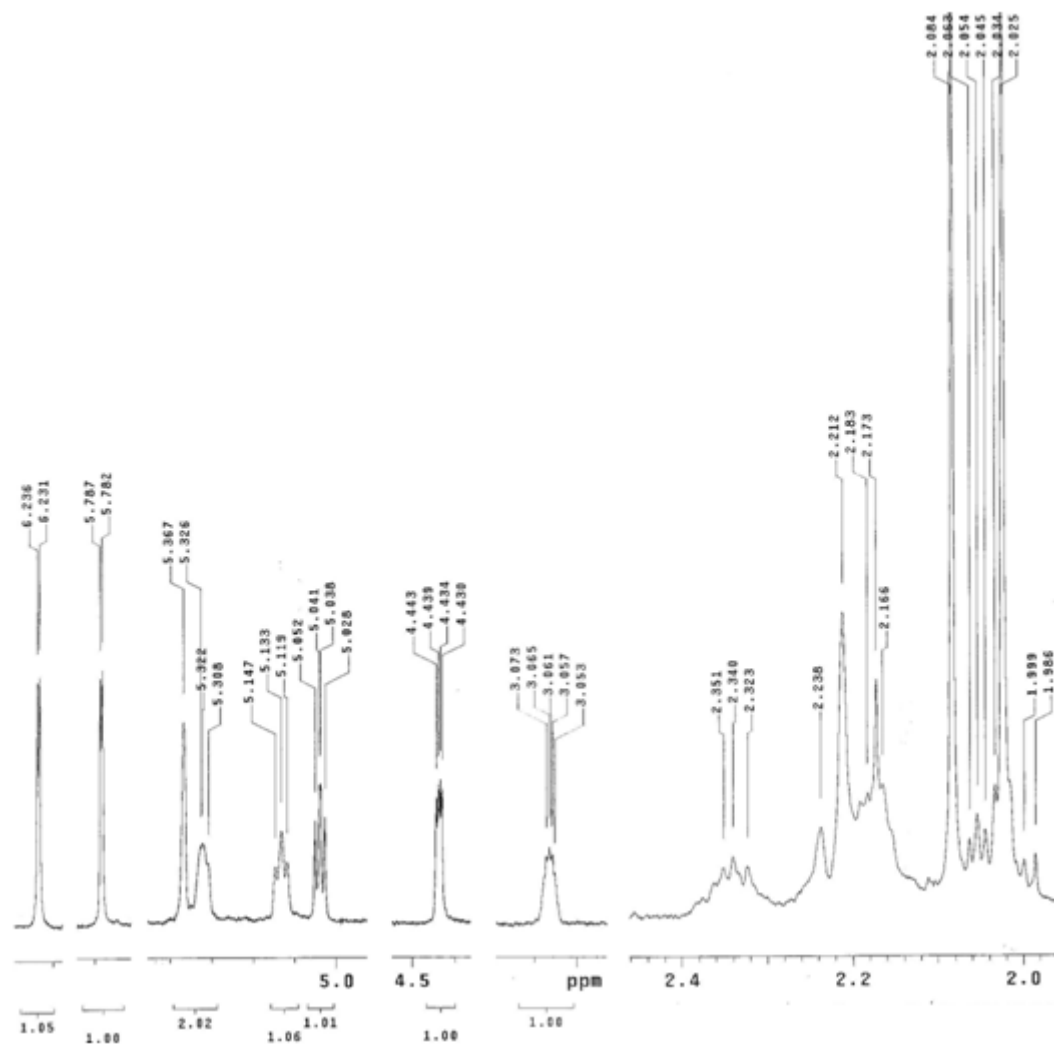

**Figure S6.**  $^{13}\text{C}$  NMR spectrum of **2** in  $\text{CDCl}_3$  at 125 MHz.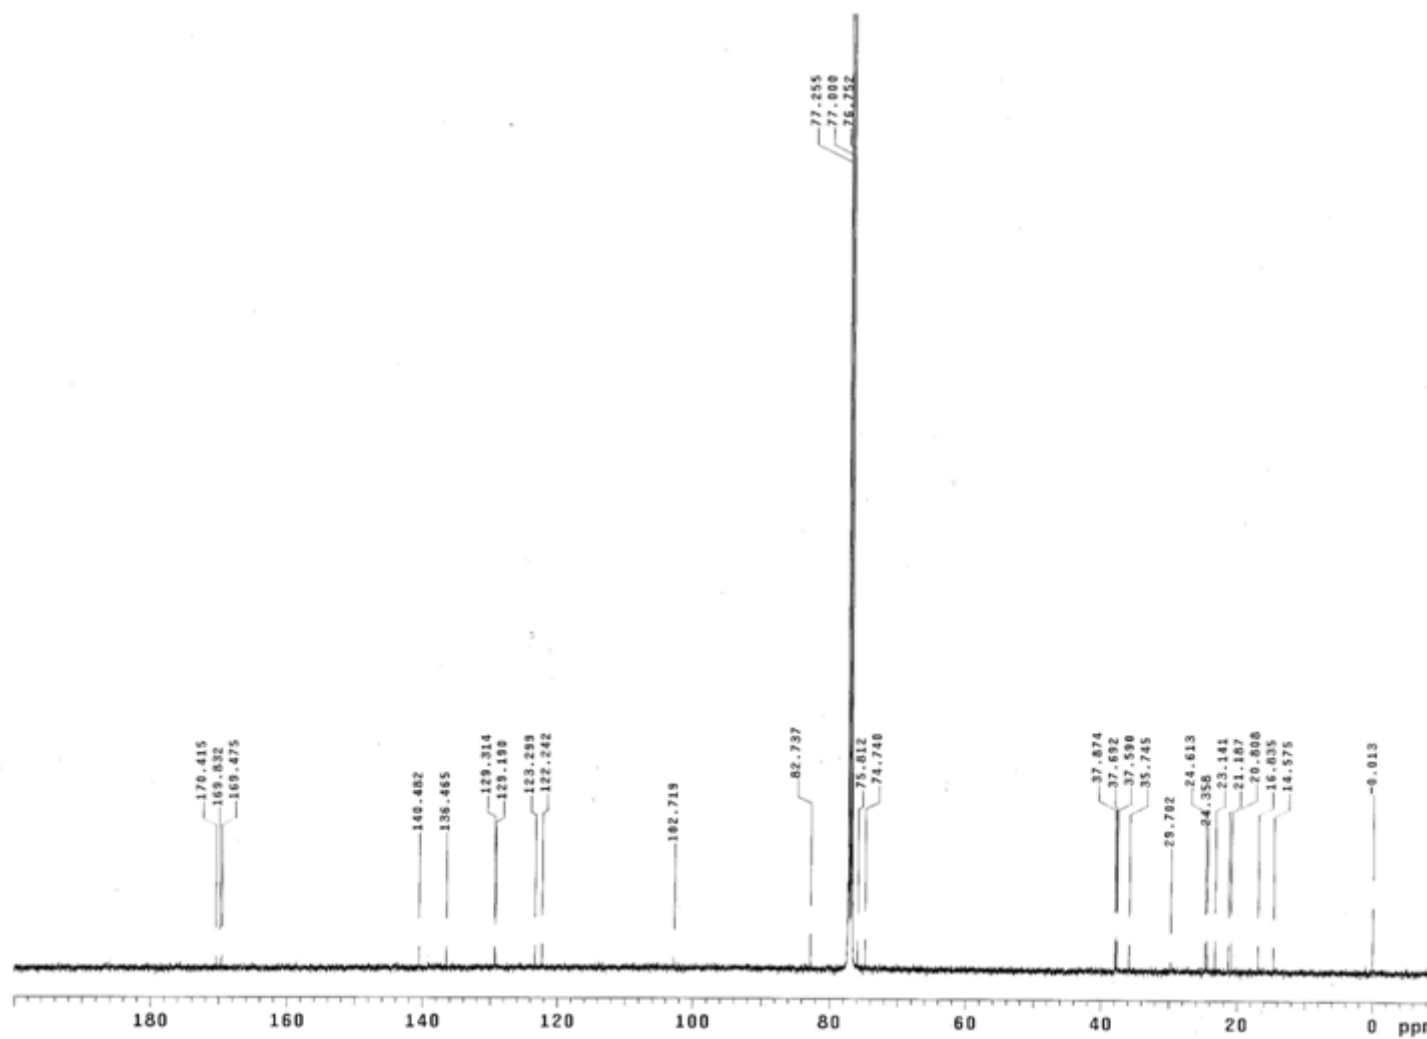

**Figure S7.**  $^1\text{H}$  NMR spectrum of **3** in  $\text{CDCl}_3$  at 500 MHz.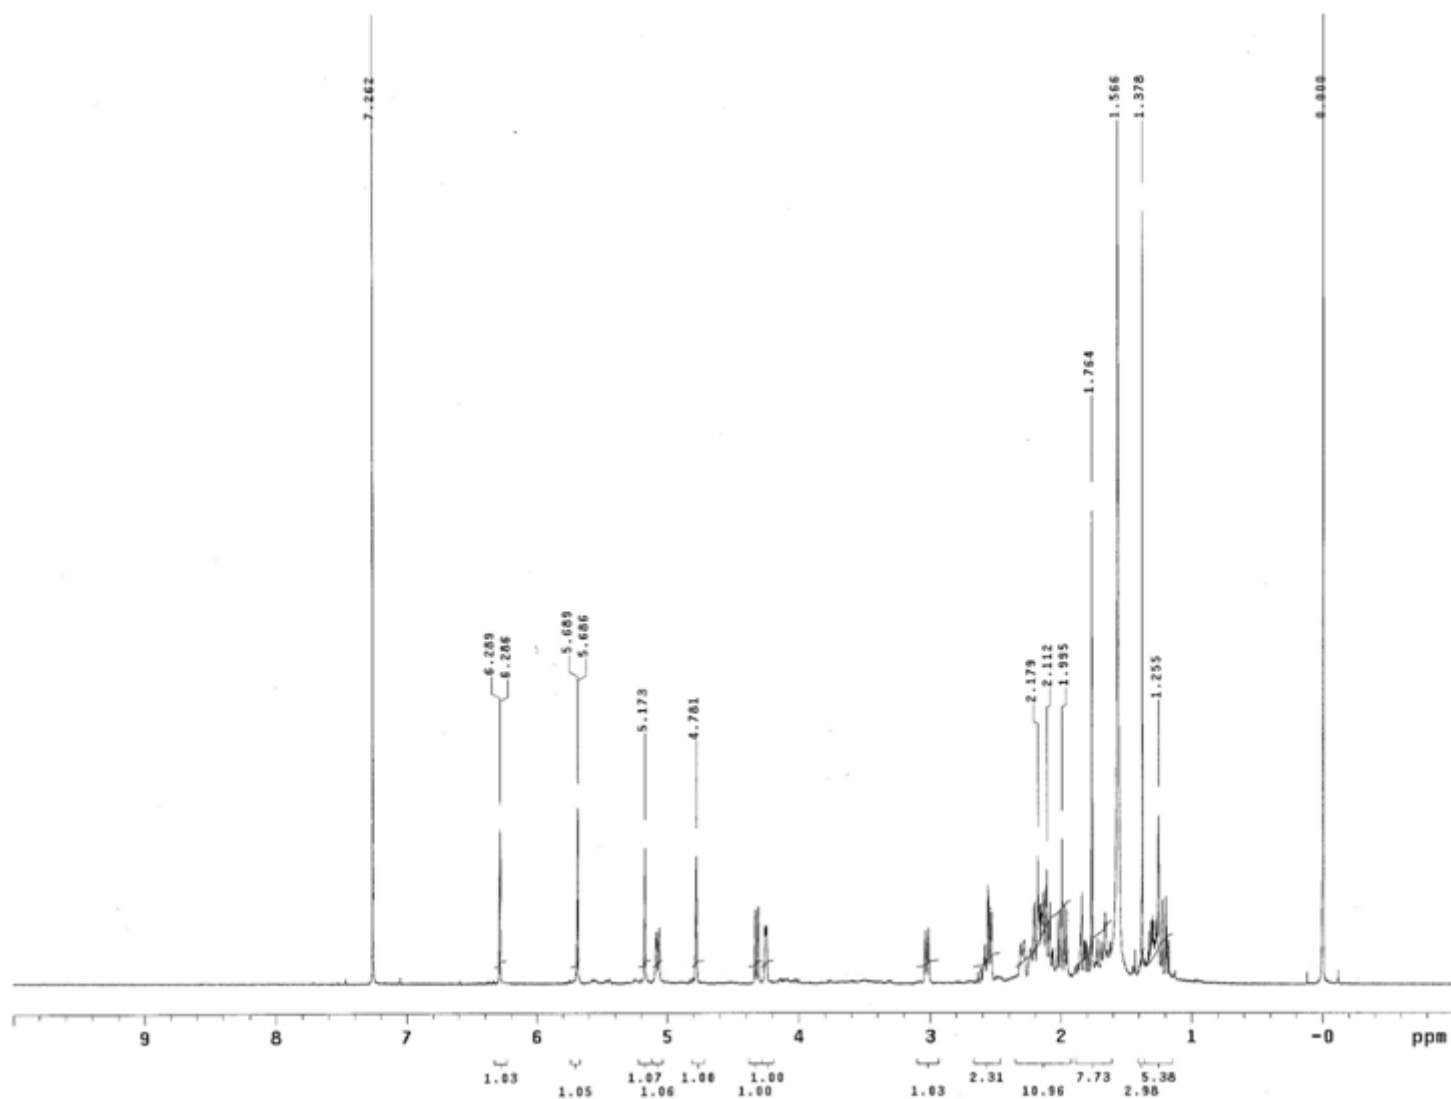

**Figure S8.**  $^1\text{H}$  NMR spectrum (1.1–6.3 ppm) of **3** in  $\text{CDCl}_3$  at 500 MHz.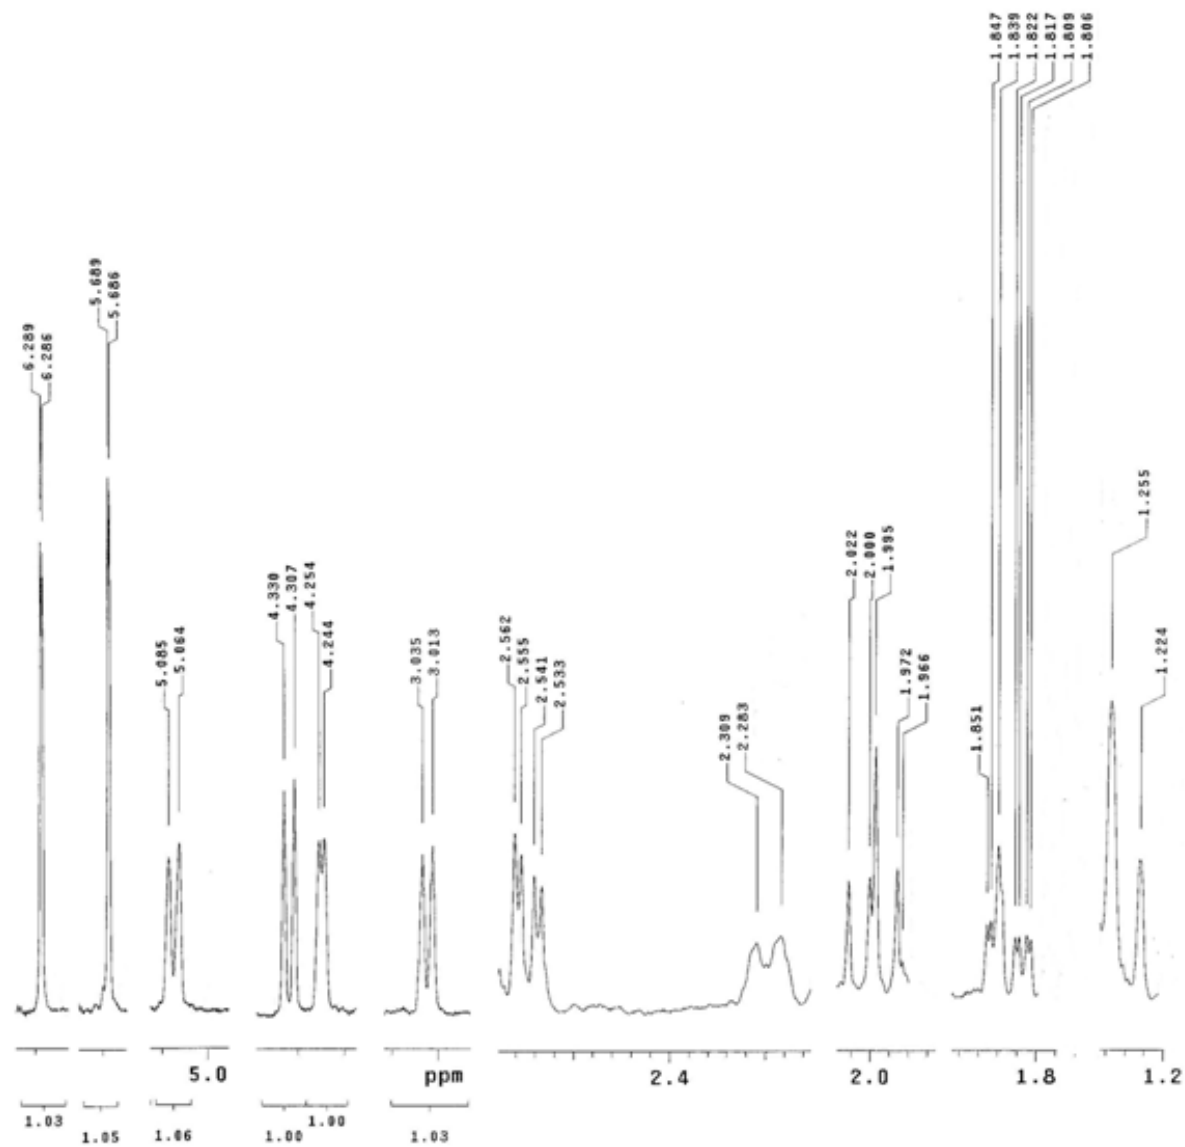

**Figure S9.**  $^{13}\text{C}$  NMR spectrum of **3** in  $\text{CDCl}_3$  at 125 MHz.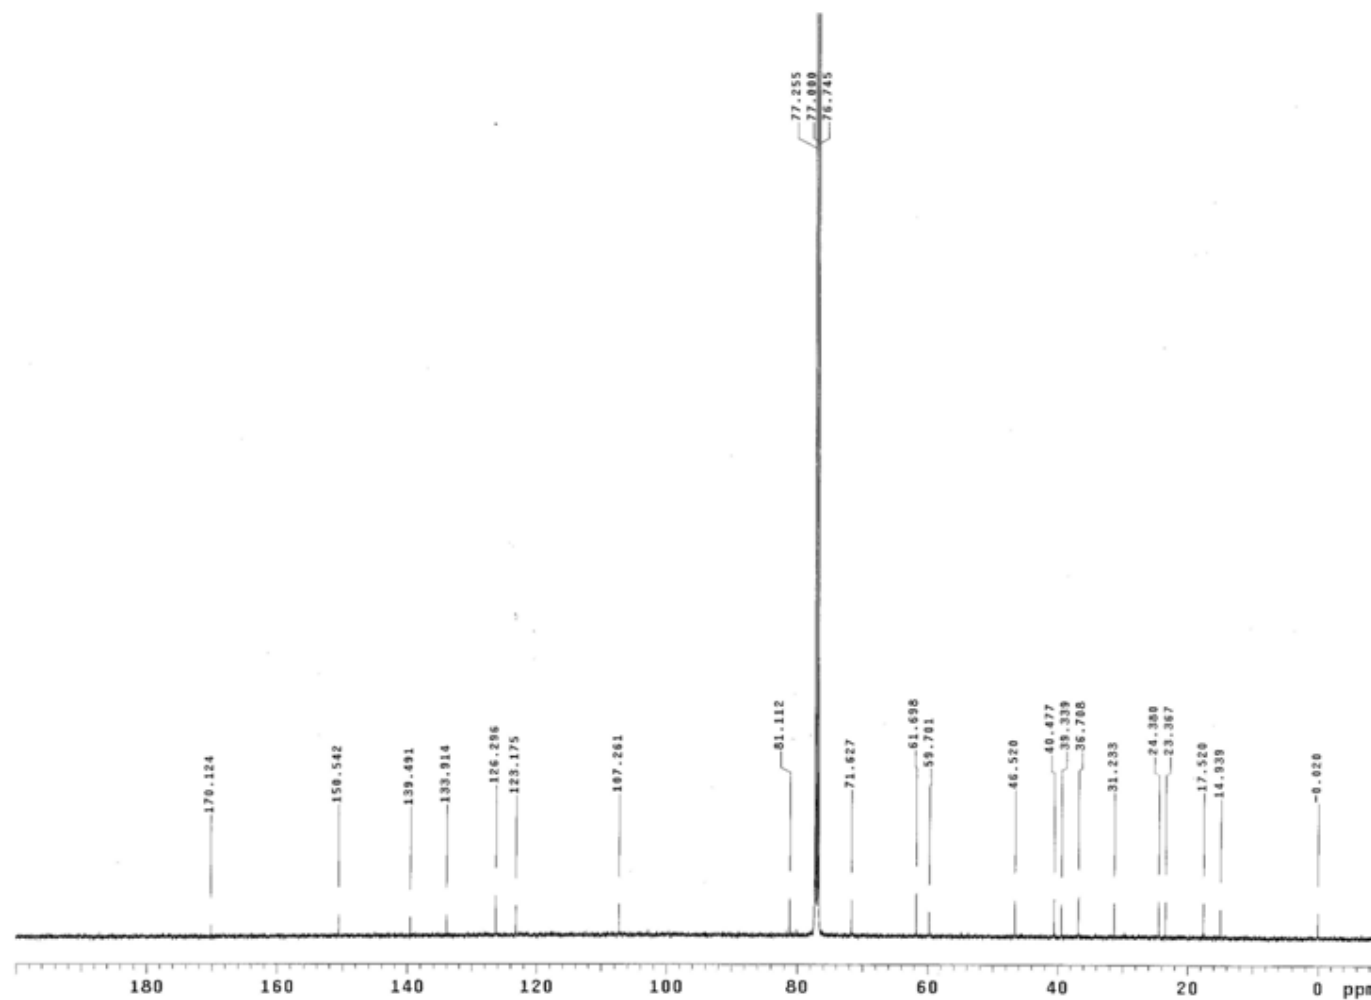

Supplement: Supplementary File 1 — Supplementary Information (PDF, 434 KB) [file marinedrugs-12-00840-s001.pdf]
